# Supplementary material for: Maleic anhydride from bio-based 1-butanol and furfural: a life cycle assessment at the pilot scale
Source: Royal Society of Chemistry journal article supplement (doi:10.1039/d2gc03707f), 2023-01-01
Supplement: d2gc03707f1.pdf [file d2gc03707f1.pdf]

1 **Maleic anhydride from bio-based 1-butanol and furfural: a life cycle assessment**  
2 **at pilot scale**

3 Raffaele Cucciniello,<sup>a,†</sup> Daniele Cespi,<sup>b,c,†,\*</sup> Matteo Riccardi,<sup>d,e</sup> Elena Neri,<sup>d,f</sup> Fabrizio Passarini,<sup>b,c</sup> and Federico Maria  
4 Pulselli<sup>d,f</sup>

5  
6 <sup>a</sup> Department of Chemistry and Biology "Adolfo Zambelli", University of Salerno, Via Giovanni Paolo II 132, 84084, Fisciano (SA), SA, Italy

7 <sup>b</sup> Department of Industrial Chemistry "Toso Montanari", University of Bologna, Viale Del Risorgimento 4, 40136, Bologna (BO), Italy

8 <sup>c</sup> Center for Chemical Catalysis - C3, Alma Mater Studiorum Università di Bologna, Viale del Risorgimento 4, Bologna (BO), Italy

9 <sup>d</sup> Ecodynamics Group, Department of Physical, Earth and Environmental Sciences, University of Siena, Pian dei Mantellini 44, Siena (SI), Italy

10 <sup>e</sup> NIER INGEGNERIA S.p.A. Via C. Bonazzi 2, 40013, Castel Maggiore (BO), Italy

11 <sup>f</sup> INDACO2 Srl, Colle di Val d'Elsa, Siena (SI), Italy

12  
13 Corresponding author: Daniele Cespi, [daniele.cespi2@unibo.it](mailto:daniele.cespi2@unibo.it)

14 <sup>†</sup> These authors contributed equally to the manuscript.

15

16 **Electronic supporting information (ESI)**

17

18

19

20

21

22

23

24

25

26

27

28

29

30

31

32

33

34

35

36

37

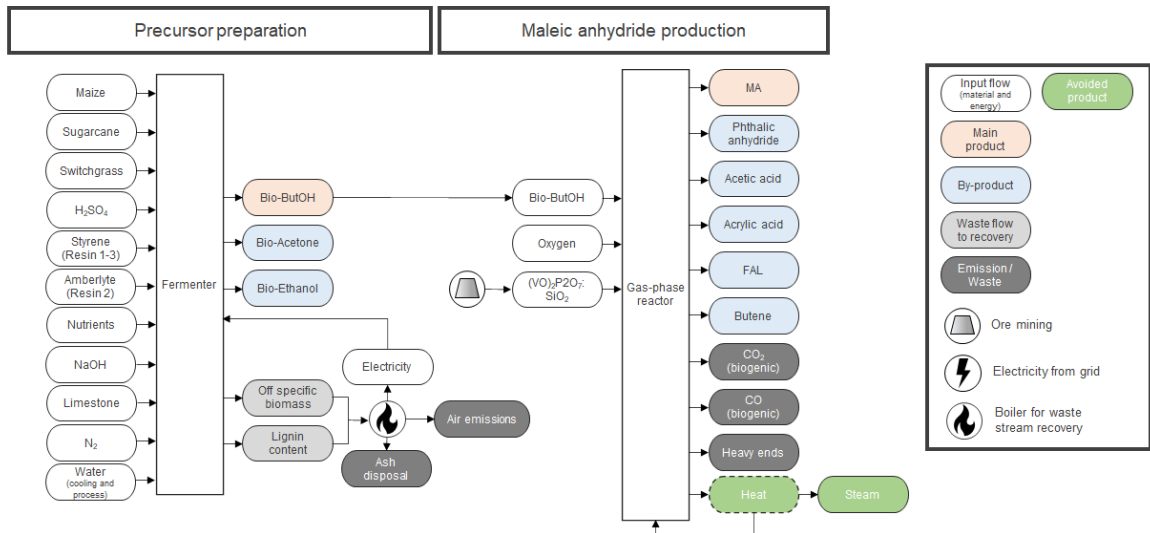

38

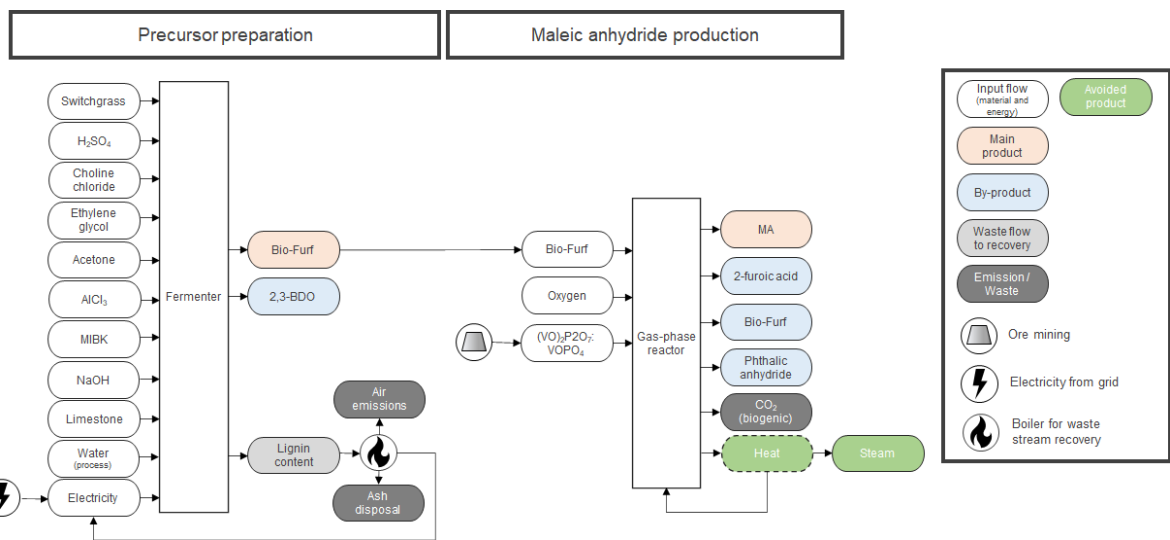

39

40 **Figure S 1** – System boundaries of the MA production from different biobased precursors, a) Bio-ButOH and b) Bio-Furf, with  
 41 considering the energy recovery from vessel. Flows related to by-products recovery were not included in the system boundaries due  
 42 to the mass allocation.

43

44

45 **Table S 1** – Calculation setup for  $E_f$ .

| <b>MA from Bio-ButOH</b> | <b>Level I <math>E_f</math></b> | <b>Level II <math>E_f</math></b> |
|--------------------------|---------------------------------|----------------------------------|
| Maleic anhydride         | Product                         | Product                          |
| Carbon dioxide           | Waste                           | Waste                            |
| Phthalic anhydride       | Waste                           | Co-product                       |
| Carbon monoxide          | Waste                           | Waste                            |
| Acetic acid              | Waste                           | Co-product                       |
| Acrylic acid             | Waste                           | Co-product                       |
| Formaldehyde             | Waste                           | Co-product                       |
| Butene                   | Waste                           | Co-product                       |
| Others                   | Waste                           | Waste                            |
|                          | 1.2E+00                         | 2.6E-01                          |
| <b>MA from Bio-Furf</b>  | <b>Level I <math>E_f</math></b> | <b>Level II <math>E_f</math></b> |
| Maleic anhydride         | Product                         | Product                          |
| Carbon dioxide           | Waste                           | Waste                            |
| 2-furoic acid            | Waste                           | Co-product                       |
| Others                   | Waste                           | Waste                            |
|                          | 8.2E-02                         | 3.0E-03                          |

46

47

48

49 **Table S 2** – LCI MA from Bio-ButOH in the case of none energy recovery from the reaction vessel. Values were allocated in mass on  
 50 software, respect to the main product (MA, 56.7%).

|                                                                                      | C    | S             | Y             | Amount        | Unit      |
|--------------------------------------------------------------------------------------|------|---------------|---------------|---------------|-----------|
| <b>Input</b>                                                                         |      |               |               |               |           |
| Bio-butanol                                                                          | 100% | -             | -             | 1938.1        | kg        |
| Oxygen (O <sub>2</sub> )                                                             | -    | -             | -             | 280.3         | kg        |
| (VO) <sub>2</sub> P <sub>2</sub> O <sub>7</sub> :SiO <sub>2</sub> (90:10) - Catalyst | -    | -             | -             | 19.4          | kg        |
| Electricity                                                                          |      |               |               | 1.2E+02       | kWh       |
| <i>Total</i>                                                                         |      |               |               | <b>2218.4</b> | <b>kg</b> |
| <b>Output</b>                                                                        |      |               |               |               |           |
| Maleic anhydride                                                                     | -    | 39.0%         | 39.0%         | 1000.0        | kg        |
| Carbon dioxide                                                                       | -    | 18.0%         | 18.0%         | 207.1         | kg        |
| Phthalic anhydride                                                                   | -    | 12.0%         | 12.0%         | 464.7         | kg        |
| Carbon monoxide                                                                      | -    | 12.0%         | 12.0%         | 87.9          | kg        |
| Acetic acid                                                                          | -    | 8.0%          | 8.0%          | 125.6         | kg        |
| Acrylic acid                                                                         | -    | 8.0%          | 8.0%          | 150.7         | kg        |
| Formaldehyde                                                                         | -    | 1.0%          | 1.0%          | 7.9           | kg        |
| Butene                                                                               | -    | 1.0%          | 1.0%          | 14.7          | kg        |
| Others*                                                                              | -    | 1.0%          | 1.0%          | 159.8         | kg        |
| Heat waste                                                                           | -    | -             | -             | 7.3 E+03      | kWh       |
| <i>Total</i>                                                                         |      | <b>100.0%</b> | <b>100.0%</b> | <b>2218.4</b> | <b>kg</b> |

51 \*Heavy end, according to Aresta, Michele, Dibenedetto, Angela and Dumeignil, Franck. Biorefineries: An Introduction, Berlin,  
 52 München, Boston: De Gruyter, 2015. <https://doi.org/10.1515/9783110331585>.<sup>1</sup>

53

54 **Table S 3** - Breakdown catalyst, MA from Bio-ButOH.

| Molecule                                        | Composition % | Amount (kg)          | MM tot (kg/kmol)    |
|-------------------------------------------------|---------------|----------------------|---------------------|
| (VO) <sub>2</sub> P <sub>2</sub> O <sub>7</sub> | 90%           | 17.4                 | 307.82              |
|                                                 | MA (kg/kmol)  | n° atom per molecule | % atom per molecule |
| V                                               | 50.94         | 2                    | 33%                 |
| O                                               | 16.00         | 9                    | 47%                 |
| P                                               | 30.97         | 2                    | 20%                 |
|                                                 |               | Amount (kg)          | MM tot (kg/kmol)    |
| SiO <sub>2</sub>                                | 10%           | 1.9                  | 80.08               |

55

56

57

58

59 **Table S 4** – LCI MA from Bio-Furf in the case of none energy recovery from the reaction vessel. Values were allocated in mass on  
 60 software, respect to the main product (MA, 92.9%).

|                                                                                   | C     | S             | Y             | Amount        | Unit      |
|-----------------------------------------------------------------------------------|-------|---------------|---------------|---------------|-----------|
| <b>Input</b>                                                                      |       |               |               |               |           |
| Furfural                                                                          | 99.2% | -             | -             | 1008.9        | kg        |
| Oxygen (O <sub>2</sub> )                                                          | -     | -             | -             | 81.4          | kg        |
| (VO) <sub>2</sub> P <sub>2</sub> O <sub>7</sub> :VOPO <sub>4</sub> - VPO Catalyst | -     | -             | -             | 10.1          | kg        |
| Electricity                                                                       |       |               |               | 1.3E+02       | kWh       |
| <i>Total</i>                                                                      |       |               |               | <b>1090.3</b> | <b>kg</b> |
| <b>Output</b>                                                                     |       |               |               |               |           |
| Maleic anhydride                                                                  | -     | 97.9%         | 97.1%         | 1000.0        | kg        |
| Carbon dioxide                                                                    | -     | 0.7%          | 0.7%          | 3.2           | kg        |
| 2-furoic acid                                                                     | -     | 0.5%          | 0.5%          | 5.8           | kg        |
| Phthalic anhydride*                                                               |       | 0.9%          | 0.9%          | 73.2          | kg        |
| Furfural**                                                                        | 0.8%  | -             | 0.8%          | 8.1           | kg        |
| Heat waste                                                                        | -     | -             | -             | 3.8E+03       | kWh       |
| <i>Total</i>                                                                      |       | <b>100.0%</b> | <b>100.0%</b> | <b>1090.3</b> | <b>kg</b> |

61 \* In the manuscript reported as “Others (include possible polymerized products and other unidentified products)”. Here in the  
 62 simulation, it was assumed to be phthalic anhydride: according to literature<sup>2</sup> MA can react with furan to produce phthalic anhydride.

63 \*\* Assuming to be recovered (100% efficiency) for the next run.

64

65 **Table S 5** - Breakdown catalyst, MA from Bio--Furf.

| Molecule                                        | Amount (kg)          | MM tot (kg/kmol)     |
|-------------------------------------------------|----------------------|----------------------|
| (VO) <sub>2</sub> P <sub>2</sub> O <sub>7</sub> | 50%                  | 5.0                  |
|                                                 | MA                   | 307.82               |
|                                                 | n° atom per molecule | % atom per molecule  |
| V                                               | 50.94                | kg atom per molecule |
|                                                 | 2                    | 33%                  |
| O                                               | 16.00                | 1.7                  |
|                                                 | 9                    | 47%                  |
| P                                               | 30.97                | 2.4                  |
|                                                 | 2                    | 20%                  |
|                                                 | 1.0                  |                      |
|                                                 | Amount (kg)          | MM tot (kg/kmol)     |
| VOPO <sub>4</sub>                               | 50%                  | 5.0                  |
|                                                 | MA                   | 161.91               |
|                                                 | n° atom per molecule | % atom per molecule  |
| V                                               | 50.94                | kg atom per molecule |
|                                                 | 1                    | 17%                  |
| O                                               | 16.00                | 0.8                  |
|                                                 | 5                    | 26%                  |
| P                                               | 30.97                | 1.3                  |
|                                                 | 1                    | 10%                  |
|                                                 | 0.5                  |                      |

66

67

| Stage                       | Material/Substance                                                                                                                                                                              | Amount    | Unit            |
|-----------------------------|-------------------------------------------------------------------------------------------------------------------------------------------------------------------------------------------------|-----------|-----------------|
| <b>Input</b>                |                                                                                                                                                                                                 |           |                 |
| Feedstock handling          | Maize                                                                                                                                                                                           | 4346.3    | kg              |
|                             | Sugarcane                                                                                                                                                                                       | 4346.3    | kg              |
|                             | Switchgrass                                                                                                                                                                                     | 4346.3    | kg              |
| Pretreatment and hydrolysis | Sulphuric acid (75%)                                                                                                                                                                            | 644.1     | kg              |
|                             | Resin (001) - styrene                                                                                                                                                                           | 9.8       | dm <sup>3</sup> |
|                             | Nutrients<br>(glucose:ammonium sulphate, 99:1)                                                                                                                                                  | 1074.2    | kg              |
| Fermentation                | Sodium hydroxide (1M)                                                                                                                                                                           | 42.3      | kg              |
|                             | Resin (002) - amberlyte                                                                                                                                                                         | 10.8      | dm <sup>3</sup> |
| Separation and purification | Resin (003) - styrene                                                                                                                                                                           | 4.6E-02   | dm <sup>3</sup> |
| Waste Water Treatment       | Sodium hydroxide                                                                                                                                                                                | 228.5     | kg              |
| Co-generator                | Limestone for FGD<br>(flue-gas desulfurization)                                                                                                                                                 | 136.2     | kg              |
|                             | Sulphuric acid (pH adjuster)                                                                                                                                                                    | 0.3       | kg              |
|                             | Nitrogen (N <sub>2</sub> gas)                                                                                                                                                                   | 0.1       | dm <sup>3</sup> |
| Utilities                   | Electricity <sup>1</sup>                                                                                                                                                                        | -         | kWh             |
|                             | Process water                                                                                                                                                                                   | 4845.2    | kg              |
|                             | Cooling water                                                                                                                                                                                   | 4845.2    | kg              |
| <b>Output</b>               |                                                                                                                                                                                                 |           |                 |
| Feedstock handling          | Off specific biomass (sent to boiler) <sup>2</sup>                                                                                                                                              | 822.1     | kg              |
| Pretreatment and hydrolysis | Lignin content (sent to boiler) <sup>3</sup>                                                                                                                                                    | 3952.0    | kg              |
| Final product               | Butanol                                                                                                                                                                                         | 1938.1    | kg              |
| Co-generator                | Ash disposal from boiler                                                                                                                                                                        | 871.2     | kg              |
| Air emissions               | Amount and type derived fromecoinvent process "Heat, district or industrial, other than natural gas {ASCC}  heat and power co-generation, wood chips, 6667 kW, state-of-the-art 2014   APOS, U" |           |                 |
| <b>Avoided products</b>     |                                                                                                                                                                                                 |           |                 |
| Energy recovery             | Electricity produced from steam <sup>4</sup>                                                                                                                                                    | -5.7 E+01 | kWh             |

70 <sup>1</sup> Not requested since able to recover energy from boiler.71 <sup>2</sup> Approximately 5% of the total fed biomass is screened (as off-spec).72 <sup>3</sup> Estimated as 25.3 % of the inlet biomass.73 <sup>4</sup> Derived from incineration of lignin and off specific biomass.

74

75

76

77

78

79

80 **Table S 7** – LCI Bio-Furf production. Values allocated in mass (31.5%) respect to the original extrapolated from literature.<sup>53,54</sup>

| Stage                                | Material/Substance                                                                                                                                                                                              | Amount    | Unit |
|--------------------------------------|-----------------------------------------------------------------------------------------------------------------------------------------------------------------------------------------------------------------|-----------|------|
| <b><u>Input</u></b>                  |                                                                                                                                                                                                                 |           |      |
| Feedstock Handling                   | Switchgrass                                                                                                                                                                                                     | 3661.8    | kg   |
| DES pretreatment                     | Sulphuric acid                                                                                                                                                                                                  | 80.1      | kg   |
|                                      | Choline chloride - [(CH <sub>3</sub> ) <sub>3</sub> NCH <sub>2</sub> CH <sub>2</sub> OH]Cl                                                                                                                      | 34.5      | kg   |
|                                      | Ethylene glycol                                                                                                                                                                                                 | 61.4      | kg   |
|                                      | Acetone                                                                                                                                                                                                         | 171.9     | kg   |
| Furfural production and distillation | Aluminium chloride (AlCl <sub>3</sub> )                                                                                                                                                                         | 7.9       | kg   |
|                                      | methyl isobutyl ketone (MIBK)                                                                                                                                                                                   | 172.7     | kg   |
| Wastewater treatment                 | Sodium hydroxide                                                                                                                                                                                                | 73.9      | kg   |
| Boiler and stream                    | Limestone for flue-gas desulfurization (FGD)                                                                                                                                                                    | 18.5      | kg   |
| Utilities                            | Sulphuric acid (pH adjuster) as Cooling Tower chemical                                                                                                                                                          | 0.1       | kg   |
|                                      | Process water                                                                                                                                                                                                   | 1360.7    | kg   |
|                                      | Electricity                                                                                                                                                                                                     | 1360.7    | kg   |
|                                      |                                                                                                                                                                                                                 | 322.4     | kWh  |
| <b><u>Output</u></b>                 |                                                                                                                                                                                                                 |           |      |
| Final product                        | Furfural                                                                                                                                                                                                        | 1008.9    | kg   |
| Boiler to treat waste                | Lignin content                                                                                                                                                                                                  | 342.6     | kg   |
| Boiler to treat waste                | Ash disposal, from lignin combustion <sup>1</sup>                                                                                                                                                               | 62.5      | kg   |
| Boiler to treat waste                | Air emissions. Amount and type derived from ecoinvent process "Heat, district or industrial, other than natural gas {ASCC}  heat and power co-generation, wood chips, 6667 kW, state-of-the-art 2014   APOS, U" |           |      |
| <b><u>Avoided products</u></b>       |                                                                                                                                                                                                                 |           |      |
| Energy recovery                      | Electricity produced from steam <sup>2</sup>                                                                                                                                                                    | -4.1 E+00 | kWh  |

81 <sup>1</sup>Assuming the same amount of ash produced per mass of combusted biomass of the bio-ButOH scenario.82 <sup>2</sup>Derived from incineration of lignin, assuming the same energy content of the bio-ButOH scenario.

83

84

85

86

87

88

89

90

91

92

93

94

95 **Eq. 1** was applied to the stoichiometric reactions to estimate the enthalpy of reaction ( $\Delta_r H^\circ$ ). Both routes are extremely exothermic.  
 96 Two scenarios were simulated. One without energy recovery (Level I<sub>EN</sub>) and in the second the heat released was assumed to be 100%  
 97 recovered to pre-heat reagents and generate steam for further plant usages (Level II<sub>EN</sub>). Energy requirements to heat reagents was  
 98 calculated using equations (3,4,5,7) already reported in literature.<sup>51</sup> The difference between the total heat requirements for heating  
 99 reagents ( $q_{tot}$  reaction) and the enthalpy of reaction ( $\Delta_r H^\circ$ ) represents the net energy input.

$$\Delta_r H^\circ = \sum v \cdot \Delta_f H^\circ_p - \sum v \cdot \Delta_f H^\circ_r$$

**Eq. 1** – Enthalpy of reaction

100

101

102

103 **Table S 8** - MA from Bio-ButOH enthalpy of reaction.

| <b>Stoichiometric reaction</b>                                                                                   |                               |         |
|------------------------------------------------------------------------------------------------------------------|-------------------------------|---------|
| <b>C<sub>4</sub>H<sub>10</sub>O + 3O<sub>2</sub> → C<sub>4</sub>H<sub>2</sub>O<sub>3</sub> + 4H<sub>2</sub>O</b> |                               |         |
| <b>Input</b>                                                                                                     | $\Delta_f H^\circ_r$ (kJ/mol) | v       |
| Bio-butanol                                                                                                      | -274.9                        | 1       |
| Oxygen (O <sub>2</sub> )                                                                                         | 498.4                         | 3       |
| $\sum v \cdot \Delta_f H^\circ_r$                                                                                | 1220.3                        |         |
| <b>Output</b>                                                                                                    | $\Delta_f H^\circ_r$ (kJ/mol) | v       |
| Maleic anhydride                                                                                                 | -398.3                        | 1       |
| Water                                                                                                            | -241.8                        | 4       |
| $\sum v \cdot \Delta_f H^\circ_p$                                                                                | -1365.5                       |         |
| $\Delta_r H^\circ$                                                                                               | -2585.8                       | MJ/kmol |
|                                                                                                                  | -7304.4                       | kWh/FU  |

104

105 **Table S 9** - MA from Bio-Furf enthalpy of reaction.

| <b>Stoichiometric reaction</b>                                                                                                              |                               |         |
|---------------------------------------------------------------------------------------------------------------------------------------------|-------------------------------|---------|
| <b>C<sub>5</sub>H<sub>4</sub>O<sub>2</sub> + 2O<sub>2</sub> → C<sub>4</sub>H<sub>2</sub>O<sub>3</sub> + CO<sub>2</sub> + H<sub>2</sub>O</b> |                               |         |
| <b>Input</b>                                                                                                                                | $\Delta_f H^\circ_r$ (kJ/mol) | v       |
| Furfural                                                                                                                                    | -274.9                        | 1       |
| Oxygen (O <sub>2</sub> )                                                                                                                    | 498.4                         | 2       |
| $\sum v \cdot \Delta_f H^\circ_r$                                                                                                           | 721.9                         |         |
| <b>Output</b>                                                                                                                               | $\Delta_f H^\circ_r$ (kJ/mol) | v       |
| Maleic anhydride                                                                                                                            | -398.3                        | 1       |
| Carbon dioxide                                                                                                                              | -393.5                        | 1       |
| Water                                                                                                                                       | -241.8                        | 1       |
| $\sum v \cdot \Delta_f H^\circ_p$                                                                                                           | -640.1                        |         |
| $\Delta_r H^\circ$                                                                                                                          | -1362.0                       | MJ/kmol |
|                                                                                                                                             | -3847.4                       | kWh/FU  |

106

107

108

109

110

111

112

113



114 **Table S 10** - MA from Bio-ButOH: full energy balance.

| <b>q bio-ButOH (liquid → gas)</b>               |                                                                            |           |                                                                                                   |           |           |
|-------------------------------------------------|----------------------------------------------------------------------------|-----------|---------------------------------------------------------------------------------------------------|-----------|-----------|
| <b>Cp liq (J/mol K)</b>                         | <b>A + BT + CT<sup>2</sup> + DT<sup>3</sup> + ET<sup>4</sup></b>           |           |                                                                                                   |           |           |
| Source:*                                        | A                                                                          | B         | C                                                                                                 | D         | E         |
| bio-ButOH (liquid)                              | 83.877                                                                     | 5.66E-01  | -0.0017208                                                                                        | 2.28E-06  | -         |
| T1(=Tenv)                                       | 298                                                                        | H at T1   | 3.95E-02                                                                                          | kJ/mol    |           |
| T2(=Tb)                                         | 391                                                                        | H at T2   | 5.51E-02                                                                                          | kJ/mol    |           |
|                                                 |                                                                            | ΔH        | 1.57E-02                                                                                          | kJ/mol    |           |
| <b>Cp gas (J/mol K)</b>                         | <b>A + B[(C/T)/sinh(C/T)]<sup>2</sup> + D[(E/T)/cosh(E/T)]<sup>2</sup></b> |           |                                                                                                   |           |           |
| Source:*                                        | A                                                                          | B         | C                                                                                                 | D         | E         |
| bio-ButOH (gas)                                 | 8.16E+00                                                                   | 4.10E-01  | -2.26E-04                                                                                         | 6.04E-08  | -6.28E-12 |
| T1(=Tb)                                         | 391                                                                        | H at T1   | 3.35E-03                                                                                          | kJ/mol    |           |
| T2(=Tr)                                         | 613                                                                        | H at T2   | 5.25E-03                                                                                          | kJ/mol    |           |
|                                                 |                                                                            | ΔH        | 1.90E-03                                                                                          | kJ/mol    |           |
| ΔH <sub>vap</sub> (Source**)                    | 43.29                                                                      | kJ/mol    | 390.9                                                                                             | K         |           |
| <b>q<sub>tot</sub> bio-ButOH</b>                | <b>4.33E+01</b>                                                            | kJ/mol    |                                                                                                   |           |           |
| <b>q oxygen (gas)</b>                           |                                                                            |           |                                                                                                   |           |           |
| <b>Cp gas (J/mol K)</b>                         | <b>A + B[(C/T)/sinh(C/T)]<sup>2</sup> + D[(E/T)/cosh(E/T)]<sup>2</sup></b> |           |                                                                                                   |           |           |
|                                                 | A                                                                          | B         | C                                                                                                 | D         | E         |
|                                                 | 29.526                                                                     | -8.90E-03 | 3.81E-05                                                                                          | -3.26E-08 | 8.86E-12  |
| T1(=Tenv)                                       | 298                                                                        | H at T1   | 8.80E-03                                                                                          | kJ/mol    |           |
| T2(=Tr)                                         | 613                                                                        | H at T2   | 1.81E-02                                                                                          | kJ/mol    |           |
|                                                 |                                                                            | ΔH        | 9.30E-03                                                                                          | kJ/mol    |           |
| <b>q tot reaction***</b>                        |                                                                            |           |                                                                                                   |           |           |
| <b>q<sub>tot</sub> bio-ButOH + q oxygen</b>     |                                                                            | 4.33E+01  | kJ/mol                                                                                            | 4.33E+04  | kJ/kmol   |
|                                                 |                                                                            |           |                                                                                                   | 4.42E+05  | kJ/FU     |
|                                                 |                                                                            |           |                                                                                                   | 1.22E+02  | kWh/FU    |
| <b>Net energy input = q tot reaction - ΔRH°</b> |                                                                            |           |                                                                                                   |           |           |
| Net energy input                                | -7.2E+03                                                                   | kWh/FU    | Since negative, it was assumed to be recovered as steam for other processes (9.4E+03 kg steam/FU) |           |           |

115 \*Ludwig's Applied Process Design for Chemical and Petrochemical Plants, Volume 1, Fourth Edition, A. Kayode Coker Gulf Professional  
 116 Publishing is an imprint of Elsevier 30 Corporate Drive, Suite 400, Burlington, MA 01803, USA Linacre House, Jordan Hill, Oxford OX2  
 117 8DP, UK 2007 Elsevier Inc.<sup>3</sup>

118 \*\*National Institute of Standards and Technology (NIST) available at <https://webbook.nist.gov/cgi/cbook.cgi?ID=C71363&Mask=4>  
 119 (accessed 22 June 2023).<sup>4</sup>

120 \*\*\*It represents the energy requirements to heat reagents according to literature.<sup>51</sup>

121

122 **Table S 11** - MA from Bio-Furf: full energy balance.

| <b>q bio-Furf (liquid → gas)</b>                |                                                                            |           |                                                                                                    |           |          |
|-------------------------------------------------|----------------------------------------------------------------------------|-----------|----------------------------------------------------------------------------------------------------|-----------|----------|
| <b>Cp liq (J/mol K)</b>                         | <b>A + BT + CT<sup>2</sup> + DT<sup>3</sup> + ET<sup>4</sup></b>           |           |                                                                                                    |           |          |
| Source:*                                        | A                                                                          | B         | C                                                                                                  | D         | E        |
| bio-Furf (liquid)                               | 73.9                                                                       | 0.2994    | -                                                                                                  | -         | -        |
| T1(=Tenv)                                       | 298                                                                        | H at T1   | 3.53E-02                                                                                           | kJ/mol    |          |
| T2(=Tb)                                         | 435                                                                        | H at T2   | 6.05E-02                                                                                           | kJ/mol    |          |
|                                                 |                                                                            | ΔH        | 2.52E-02                                                                                           | kJ/mol    |          |
| <b>Cp gas (J/mol K)</b>                         | <b>A + B[(C/T)/sinh(C/T)]<sup>2</sup> + D[(E/T)/cosh(E/T)]<sup>2</sup></b> |           |                                                                                                    |           |          |
| Source:*                                        | A                                                                          | B         | C                                                                                                  | D         | E        |
| bio-Furf (gas)                                  | 47.3                                                                       | 198.3     | 1040.6                                                                                             | 109       | 472.6    |
| T1(=Tb)                                         | 435                                                                        | H at T1   | 1.89E-01                                                                                           | kJ/mol    |          |
| T2(=Tr)                                         | 633                                                                        | H at T2   | 2.20E-01                                                                                           | kJ/mol    |          |
|                                                 |                                                                            | ΔH        | 3.03E-02                                                                                           | kJ/mol    |          |
| ΔH <sub>vap</sub> (Source**)                    | 44.7                                                                       | kJ/mol    | range 357-435                                                                                      | K         |          |
| <b>q<sub>tot</sub> bio-Furf</b>                 | <b>4.48E+01</b>                                                            |           | kJ/mol                                                                                             |           |          |
| <b>q oxygen</b>                                 |                                                                            |           |                                                                                                    |           |          |
| <b>Cp gas (J/mol K)</b>                         | <b>A + B[(C/T)/sinh(C/T)]<sup>2</sup> + D[(E/T)/cosh(E/T)]<sup>2</sup></b> |           |                                                                                                    |           |          |
|                                                 | A                                                                          | B         | C                                                                                                  | D         | E        |
|                                                 | 29.526                                                                     | -8.90E-03 | 3.81E-05                                                                                           | -3.26E-08 | 8.86E-12 |
| T1                                              | 298                                                                        | H at T1   | 8.80E-03                                                                                           | kJ/mol    |          |
| T2(=Tr)                                         | 633                                                                        | H at T2   | 1.87E-02                                                                                           | kJ/mol    |          |
|                                                 |                                                                            | ΔH        | 9.89E-03                                                                                           | kJ/mol    |          |
| <b>q tot reaction***</b>                        |                                                                            |           |                                                                                                    |           |          |
| <b>q<sub>tot</sub> bio-Fur + q oxygen</b>       | 4.48E+01                                                                   |           | kJ/mol                                                                                             | 4.48E+04  | kJ/kmol  |
|                                                 |                                                                            |           |                                                                                                    | 4.57E+05  | kJ/FU    |
|                                                 |                                                                            |           |                                                                                                    | 1.26E+02  | kWh/FU   |
| <b>Net energy input = q tot reaction - ΔrH°</b> |                                                                            |           |                                                                                                    |           |          |
| Net energy input                                | -3.7E+03                                                                   | kWh/FU    | Since negative, it was assumed to be recovered as steam for other processes (4.9 E+03 kg steam/FU) |           |          |

123 \*TransFurans Chemicals bvba. Available at: <https://pdf4pro.com/amp/view/physical-properties-of-furfural-483595.html> (accessed  
124 22 June 2023).<sup>5</sup>

125 \*\*National Institute of Standards and Technology (NIST). Available at: <https://webbook.nist.gov/cgi/cbook.cgi?ID=C98011&Mask=4>  
126 (accessed 22 June 2023).<sup>6</sup>

127 \*\*\*It represents the energy requirements to heat reagents according to literature.<sup>51</sup>

128

129  
130

**Table S 12** – LCI MA from Bio-ButOH in the case of 100% energy recovery from the reaction vessel to produce steam. Values were allocated in mass on software, respect to the main product (MA, 56.7%).

|                                                                                      | C    | S             | Y             | Amount        | Unit      |
|--------------------------------------------------------------------------------------|------|---------------|---------------|---------------|-----------|
| <b>Input</b>                                                                         |      |               |               |               |           |
| Bio-butanol                                                                          | 100% | -             | -             | 1938.1        | kg        |
| Oxygen (O <sub>2</sub> )                                                             | -    | -             | -             | 280.3         | kg        |
| (VO) <sub>2</sub> P <sub>2</sub> O <sub>7</sub> :SiO <sub>2</sub> (90:10) - Catalyst | -    | -             | -             | 19.4          | kg        |
| Electricity                                                                          |      |               |               | 0.0           | kWh       |
| <i>Total</i>                                                                         |      |               |               | <i>2218.4</i> | <i>kg</i> |
| <b>Output</b>                                                                        |      |               |               |               |           |
| Maleic anhydride                                                                     | -    | 39.0%         | 39.0%         | 1000.0        | kg        |
| Carbon dioxide                                                                       | -    | 18.0%         | 18.0%         | 207.1         | kg        |
| Phthalic anhydride                                                                   | -    | 12.0%         | 12.0%         | 464.7         | kg        |
| Carbon monoxide                                                                      | -    | 12.0%         | 12.0%         | 87.9          | kg        |
| Acetic acid                                                                          | -    | 8.0%          | 8.0%          | 125.6         | kg        |
| Acrylic acid                                                                         | -    | 8.0%          | 8.0%          | 150.7         | kg        |
| Formaldehyde                                                                         | -    | 1.0%          | 1.0%          | 7.9           | kg        |
| Butene                                                                               | -    | 1.0%          | 1.0%          | 14.7          | kg        |
| Others*                                                                              | -    | 1.0%          | 1.0%          | 159.8         | kg        |
| Heat waste                                                                           | -    | -             | -             | 0.0           | kWh       |
| <i>Total</i>                                                                         |      | <i>100.0%</i> | <i>100.0%</i> | <i>2218.4</i> | <i>kg</i> |
| <b>Avoided product</b>                                                               |      |               |               |               |           |
| Steam                                                                                | -    | -             | -             | -9.4E+3       | kg        |

131  
132

\*Heavy end, according to Aresta, Michele, Dibenedetto, Angela and Dumeignil, Franck. Biorefineries: An Introduction, Berlin, München, Boston: De Gruyter, 2015. <https://doi.org/10.1515/9783110331585>.<sup>1</sup>

133

134

135 **Table S 13** – LCI MA from Bio-Furf in the case of 100% energy recovery from the reaction vessel to produce steam. Values were  
 136 allocated in mass on software, respect to the main product (MA, 92.9%).

|                                                                                   | C     | S             | Y             | Amount        | Unit      |
|-----------------------------------------------------------------------------------|-------|---------------|---------------|---------------|-----------|
| <b>Input</b>                                                                      |       |               |               |               |           |
| Furfural                                                                          | 99.2% | -             | -             | 1008.9        | kg        |
| Oxygen (O <sub>2</sub> )                                                          | -     | -             | -             | 81.4          | kg        |
| (VO) <sub>2</sub> P <sub>2</sub> O <sub>7</sub> :VOPO <sub>4</sub> - VPO Catalyst | -     | -             | -             | 10.1          | kg        |
| Electricity                                                                       |       |               |               | 0.0           | kWh       |
| <i>Total</i>                                                                      |       |               |               | <b>1090.3</b> | <b>kg</b> |
| <b>Output</b>                                                                     |       |               |               |               |           |
| Maleic anhydride                                                                  | -     | 97.9%         | 97.1%         | 1000.0        | kg        |
| Carbon dioxide                                                                    | -     | 0.7%          | 0.7%          | 3.2           | kg        |
| 2-furoic acid                                                                     | -     | 0.5%          | 0.5%          | 5.8           | kg        |
| Phthalic anhydride*                                                               |       | 0.9%          | 0.9%          | 73.2          | kg        |
| Furfural**                                                                        | 0.8%  | -             | 0.8%          | 8.1           | kg        |
| Heat waste                                                                        | -     | -             | -             | 0.0           | kWh       |
| <i>Total</i>                                                                      |       | <b>100.0%</b> | <b>100.0%</b> | <b>1090.3</b> | <b>kg</b> |
| <b>Avoided product</b>                                                            |       |               |               |               |           |
| Steam                                                                             | -     | -             | -             | -4.9E+3       | kg        |

137 \* In the manuscript reported as "Others (include possible polymerized products and other unidentified products)". Here in the  
 138 simulation, it was assumed to be phthalic anhydride: according to literature<sup>61</sup> MA can react with furan to produce phthalic anhydride.

139 \*\* Assuming to be recovered (100% efficiency) for the next run.

140

141

142 **Table S 14** – Carbon footprint (in kgCO<sub>2</sub>eq.) of the bio-based MA routes, with and w/o the energy recovery IPCC 2021 GWP100 (incl.  
143 CO<sub>2</sub> uptake), v.1.01.

| Impact category                 | Bio-ButOH MA | Bio-Furf MA | Bio-ButOH MA+En.Recov. | Bio-Furf MA+En.Recov. |
|---------------------------------|--------------|-------------|------------------------|-----------------------|
| GWP100 - fossil                 | 1999.2       | 839.9       | 478.0                  | -471.2                |
| GWP100 - biogenic               | 537.0        | 28.0        | 491.7                  | -13.4                 |
| GWP100 – CO <sub>2</sub> uptake | 94.3         | 0.6         | 94.1                   | 0.3                   |
| GWP100 - land use and transf.   | -8606.5      | -2321.8     | -8575.8                | -2294.6               |

144

145 **Table S 15** – Resources consumption (in GJ eq.) of the bio-based MA routes, with and w/o the energy recovery. Absolute values  
146 using CED method (v.1.11).

| Impact category               | Bio-ButOH MA   | Bio-Furf MA    | Bio-ButOH MA+En.Recov. | Bio-Furf MA+En.Recov. |
|-------------------------------|----------------|----------------|------------------------|-----------------------|
| <i>Total</i>                  | <i>1.2E+02</i> | <i>4.4E+01</i> | <i>9.2E+01</i>         | <i>2.2E+01</i>        |
| Non-renewable, fossil         | 2.2E+01        | 1.6E+01        | -1.7E+00               | -4.1E+00              |
| Non-renewable, nuclear        | 1.6E+00        | 1.8E+00        | 6.9E-01                | 8.3E-01               |
| Non-renewable, biomass        | 2.3E-01        | 2.3E-04        | 2.3E-01                | 9.6E-05               |
| <i>Tot. Non-renewables</i>    | <i>2.4E+01</i> | <i>1.8E+01</i> | <i>-7.5E-01</i>        | <i>-3.3E+00</i>       |
| Renewable, biomass            | 9.2E+01        | 2.6E+01        | 9.2E+01                | 2.5E+01               |
| Renewable, wind, solar, geoth | 2.1E-01        | 1.8E-01        | 9.9E-02                | 6.2E-02               |
| Renewable, water              | 5.9E-01        | 3.4E-01        | 4.2E-01                | 1.6E-01               |
| <i>Tot. Renewables</i>        | <i>9.3E+01</i> | <i>2.6E+01</i> | <i>9.3E+01</i>         | <i>2.6E+01</i>        |

147

148

149 **Table S 16** – Carbon footprint (in kgCO<sub>2</sub>eq.) of the production of 1ton of bio-ButOH, IPCC 2021 GWP100 (incl. CO<sub>2</sub> uptake), v.1.01.

| Impact category                 | Total    | Maize    | Sugarcane | Switchgrass | Sulphuric acid (pretreatment and hydrolysis) | Resin (001) - styrene | Nutrient - ammonium sulphate | Nutrient - glucose | Sodium hydroxide (fermentation) | Resin (002) - amberlyte | Resin (003) - styrene | Sodium hydroxide (WWT) | Limestone for FGD | Sulphuric acid (pH adjuster) | Air emissions from wood boiler | Electricity recovered | Ash disposal |
|---------------------------------|----------|----------|-----------|-------------|----------------------------------------------|-----------------------|------------------------------|--------------------|---------------------------------|-------------------------|-----------------------|------------------------|-------------------|------------------------------|--------------------------------|-----------------------|--------------|
| GWP100 - fossil                 | 1.8E+03  | 7.7E+02  | -2.1E+00  | 2.1E+02     | 2.3E+01                                      | 1.1E+01               | 4.6E+01                      | 6.1E+02            | 2.0E+01                         | 6.2E+00                 | 5.2E-02               | 1.1E+02                | 1.1E-01           | 1.1E-02                      | 1.2E-01                        | -9.2E+00              | 5.5E+00      |
| GWP100 - biogenic               | 3.8E+02  | 5.0E+01  | 2.8E+02   | 2.9E-01     | 8.3E-01                                      | 8.5E-02               | 7.9E-01                      | 2.2E+01            | 6.5E-01                         | 1.5E-01                 | 4.0E-04               | 3.5E+00                | 8.8E-04           | 3.9E-04                      | 1.8E+01                        | -1.2E+00              | 3.3E+00      |
| GWP100 - land transformation    | 8.6E+01  | 4.6E+01  | 3.8E+01   | 5.5E-03     | 1.4E-02                                      | 5.5E-03               | 1.6E-02                      | 8.3E-01            | 4.0E-02                         | 7.5E-04                 | 2.6E-05               | 2.2E-01                | 3.1E-05           | 6.7E-06                      | 0.0E+00                        | -2.4E-02              | 4.4E-02      |
| GWP100 - CO <sub>2</sub> uptake | -7.8E+03 | -2.6E+03 | -1.3E+03  | -2.9E+03    | -2.6E-01                                     | -4.8E-02              | -3.0E-01                     | -9.5E+02           | -3.8E-01                        | -6.3E-02                | -2.2E-04              | -2.0E+00               | -5.4E-04          | -1.2E-04                     | 0.0E+00                        | 4.7E-01               | -2.0E+00     |

150

151

152 **Table S 17** – Carbon footprint (in kgCO<sub>2</sub>eq.) of the production of 1ton of bio-Furf, IPCC 2021 GWP100 (incl. CO<sub>2</sub> uptake), v.1.01.

| Impact category                 | Total    | Switchgrass | Sulphuric acid (DES pretreatment) | Choline chloride | Ethylene glycol | Acetone  | Aluminium chloride | methyl isobutyl ketone (MIBK) | Sodium hydroxide | Limestone for FGD | Sulphuric acid (pH adjuster) | Air emissions from wood boiler | Electricity | Ash disposal |
|---------------------------------|----------|-------------|-----------------------------------|------------------|-----------------|----------|--------------------|-------------------------------|------------------|-------------------|------------------------------|--------------------------------|-------------|--------------|
| GWP100 - fossil                 | 8.6E+02  | 1.8E+02     | 2.9E+00                           | 2.5E+01          | 4.9E+01         | 1.6E+02  | 1.7E+01            | 3.1E+02                       | 3.6E+01          | 1.5E-02           | 4.5E-03                      | 8.7E-03                        | 7.1E+01     | 4.0E-01      |
| GWP100 - biogenic               | 2.0E+01  | 2.5E-01     | 1.1E-01                           | 6.2E-01          | 5.9E-01         | 8.2E-01  | 1.6E-01            | 5.8E+00                       | 1.2E+00          | 1.2E-04           | 1.6E-04                      | 1.3E+00                        | 9.3E+00     | 2.4E-01      |
| GWP100 - land transformation    | 5.2E-01  | 4.8E-03     | 1.8E-03                           | 1.3E-02          | 4.5E-02         | 1.8E-02  | 4.7E-02            | 1.3E-01                       | 7.2E-02          | 4.3E-06           | 2.8E-06                      | 0.0E+00                        | 1.8E-01     | 3.2E-03      |
| GWP100 - CO <sub>2</sub> uptake | -2.5E+03 | -2.5E+03    | -3.4E-02                          | -2.4E-01         | -3.5E-01        | -2.4E-01 | -9.5E-02           | -2.3E+00                      | -6.8E-01         | -7.4E-05          | -5.2E-05                     | 0.0E+00                        | -3.6E+00    | -1.5E-01     |

153

154

155

156

157  
158

**Table S 18** – Total resources consumption (in GJ eq.) of the bio-based MA routes, with and w/o the energy recovery. Pairwise comparison using CED method (v.1.11).

|                        | Bio-ButOH AM | Bio-Furf AM | Bio-ButOH AM+En.Recov. | Bio-Furf AM+En.Recov. |
|------------------------|--------------|-------------|------------------------|-----------------------|
| Bio-ButOH AM           | 0.0          | 72.7        | 25.0                   | 94.5                  |
| Bio-Furf AM            | -72.7        | 0.0         | -47.7                  | 21.8                  |
| Bio-ButOH AM+En.Recov. | -25.0        | 47.7        | 0.0                    | 69.5                  |
| Bio-Furf AM+En.Recov.  | -94.5        | -21.8       | -69.5                  | 0.0                   |

159

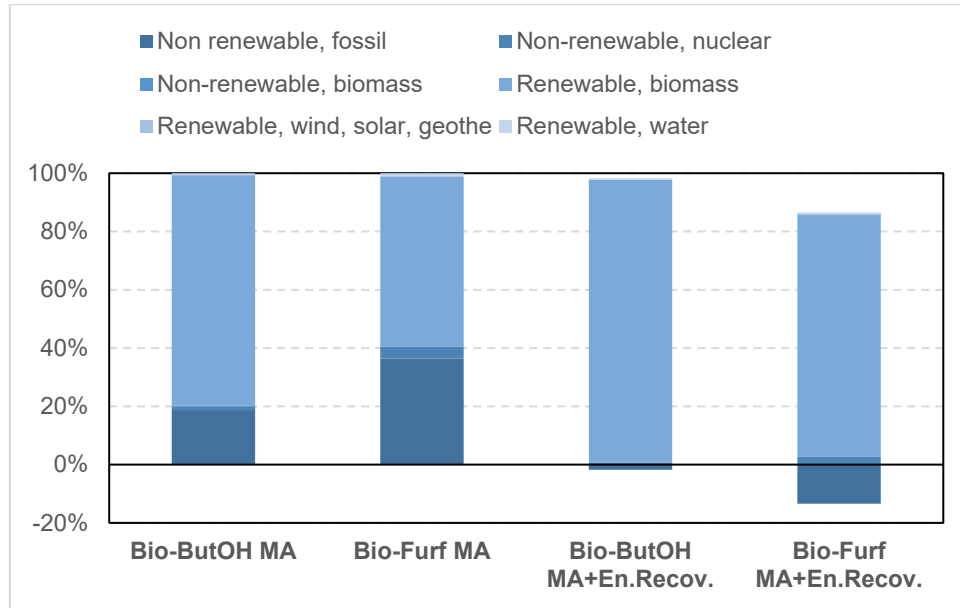

160

161  
162

**Figure S 2** – Resources consumption of the bio-based MA routes, with and w/o the energy recovery. Contribution analysis using CED method (v.1.11).

163

164

165

166

167

168

169

170

171

172

173

174

175

176

177

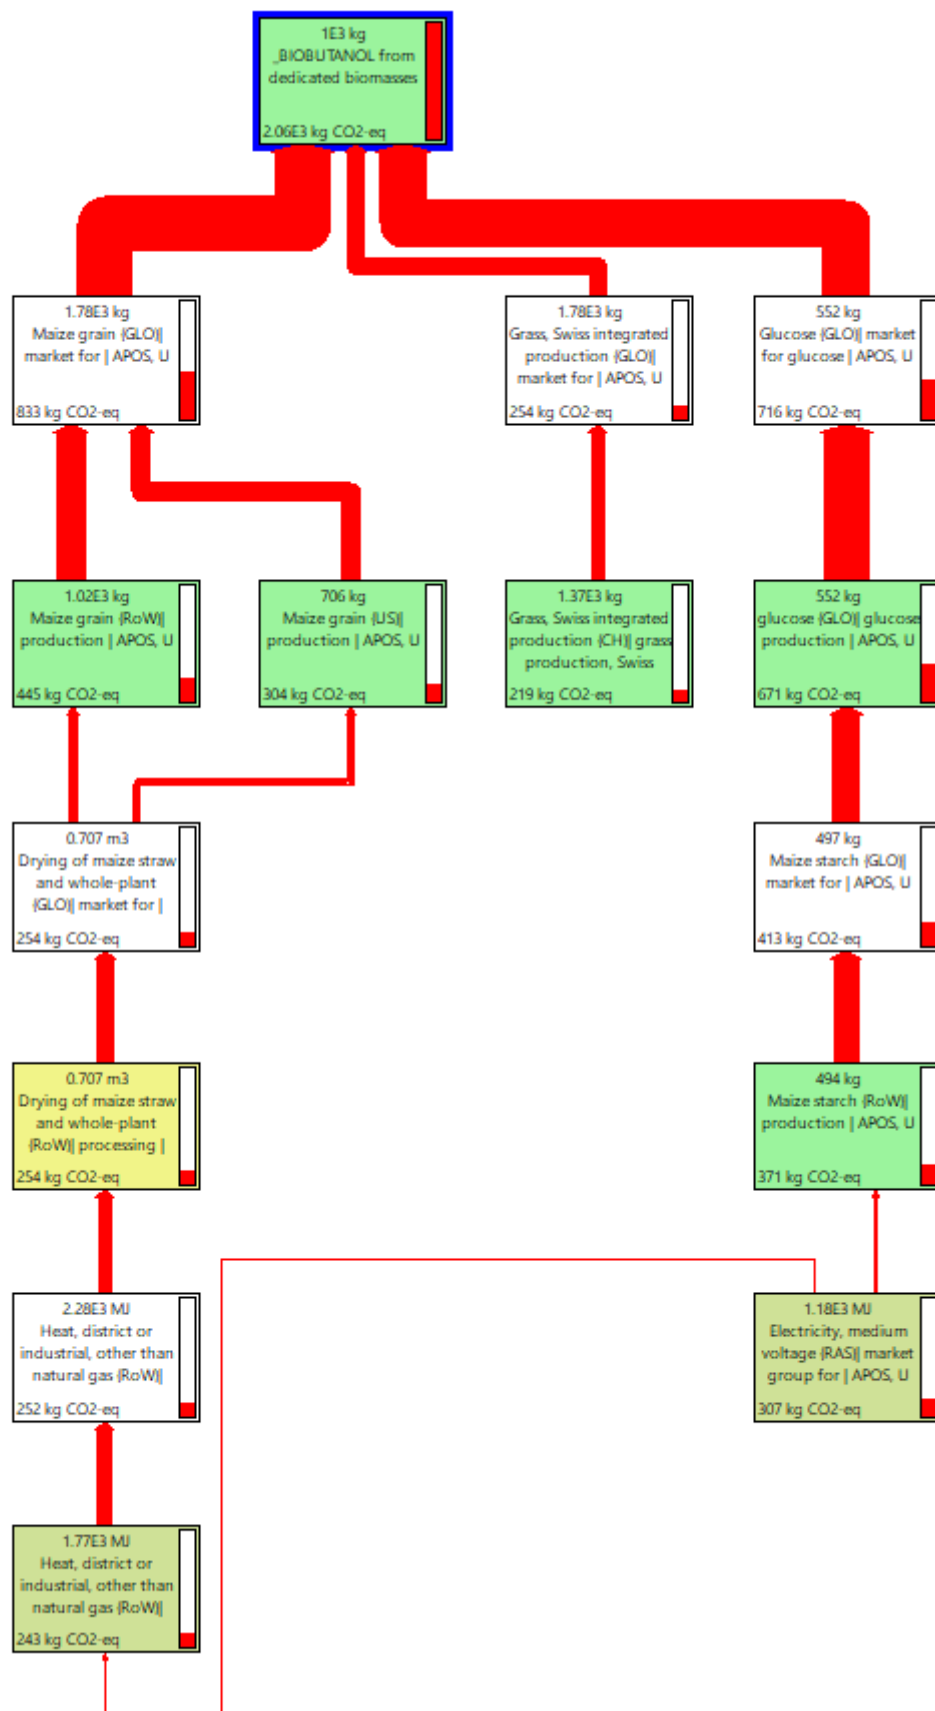

Figure S 3 – Bio-ButOH production (1 ton): Sankey-based diagram for the fossil indicator IPCC 2021 GWP100 (incl. CO<sub>2</sub> uptake), v.1.01.

182 **Table S 19** – Contribution analysis of the bio-ButOH MA+En.Recov. (A) and bio-Furf MA+En.Recov. (B) using ReCiPe 2016 method  
 183 (v.1.07).

184 **A)**

| Impact category | Unit                     | Total    | bio-ButOH | Catalyst | Steam recovery |
|-----------------|--------------------------|----------|-----------|----------|----------------|
| GW              | kg CO <sub>2</sub> eq    | 6.4E+02  | 2.2E+03   | 4.6E-02  | -1.5E+03       |
| SOD             | kg CFC11 eq              | 2.1E-02  | 2.1E-02   | 1.5E-08  | -3.7E-04       |
| IR              | kBq Co-60 eq             | 3.6E+01  | 7.2E+01   | 3.1E-04  | -3.5E+01       |
| OF HH           | kg NO <sub>x</sub> eq    | 4.7E+00  | 6.4E+00   | 2.4E-04  | -1.7E+00       |
| FPMF            | kg PM <sub>2.5</sub> eq  | 6.2E+00  | 7.3E+00   | 9.2E-05  | -1.1E+00       |
| OF TE           | kg NO <sub>x</sub> eq    | 4.7E+00  | 6.4E+00   | 2.4E-04  | -1.7E+00       |
| TA              | kg SO <sub>2</sub> eq    | 3.2E+01  | 3.5E+01   | 2.3E-04  | -3.4E+00       |
| FWEu            | kg P eq                  | 8.7E-01  | 1.1E+00   | 1.2E-05  | -1.9E-01       |
| MEu             | kg N eq                  | 4.3E+00  | 4.3E+00   | 5.0E-07  | -9.7E-03       |
| TEu             | kg 1,4-DCB               | 3.0E+03  | 5.1E+03   | 3.1E-01  | -2.2E+03       |
| FWEc            | kg 1,4-DCB               | 1.8E+02  | 1.8E+02   | 3.6E-04  | -4.7E+00       |
| MEc             | kg 1,4-DCB               | 2.3E+02  | 2.4E+02   | 6.5E-04  | -7.6E+00       |
| HCT             | kg 1,4-DCB               | 2.7E+01  | 3.7E+01   | 6.9E-04  | -1.1E+01       |
| HNCT            | kg 1,4-DCB               | 5.5E+03  | 5.7E+03   | 2.3E-02  | -2.4E+02       |
| LU              | m <sup>2</sup> a crop eq | 3.3E+03  | 3.4E+03   | 1.3E-02  | -2.7E+01       |
| MRS             | kg Cu eq                 | 1.6E+01  | 2.4E+00   | 1.3E+01  | -8.4E-02       |
| FRS             | kg oil eq                | -3.8E+01 | 4.7E+02   | 1.1E-02  | -5.1E+02       |
| WC              | m <sup>3</sup>           | 3.7E+02  | 3.8E+02   | 3.5E-04  | -1.6E+00       |

185

186 **B)**

| Impact category | Unit                     | Total    | bio-Furf | Catalyst | Steam recovery |
|-----------------|--------------------------|----------|----------|----------|----------------|
| GW              | kg CO <sub>2</sub> eq    | -4.5E+02 | 8.3E+02  | 0.0E+00  | -1.3E+03       |
| SOD             | kg CFC11 eq              | 4.1E-03  | 4.4E-03  | 0.0E+00  | -3.1E-04       |
| IR              | kBq Co-60 eq             | 2.4E+01  | 5.4E+01  | 0.0E+00  | -3.0E+01       |
| OF HH           | kg NO <sub>x</sub> eq    | 8.8E-01  | 2.3E+00  | 0.0E+00  | -1.4E+00       |
| FPMF            | kg PM <sub>2.5</sub> eq  | 1.4E+00  | 2.3E+00  | 0.0E+00  | -9.5E-01       |
| OF TE           | kg NO <sub>x</sub> eq    | 1.1E+00  | 2.5E+00  | 0.0E+00  | -1.4E+00       |
| TA              | kg SO <sub>2</sub> eq    | 9.9E+00  | 1.3E+01  | 0.0E+00  | -2.9E+00       |
| FWEu            | kg P eq                  | 1.8E+00  | 1.9E+00  | 0.0E+00  | -1.6E-01       |
| MEu             | kg N eq                  | 1.0E+00  | 1.0E+00  | 0.0E+00  | -8.3E-03       |
| TEu             | kg 1,4-DCB               | -1.2E+03 | 6.7E+02  | 0.0E+00  | -1.9E+03       |
| FWEc            | kg 1,4-DCB               | 1.2E+01  | 1.6E+01  | 0.0E+00  | -4.0E+00       |
| MEc             | kg 1,4-DCB               | 1.5E+01  | 2.2E+01  | 0.0E+00  | -6.4E+00       |
| HCT             | kg 1,4-DCB               | 8.9E+00  | 1.8E+01  | 0.0E+00  | -8.9E+00       |
| HNCT            | kg 1,4-DCB               | 5.6E+02  | 7.6E+02  | 0.0E+00  | -2.0E+02       |
| LU              | m <sup>2</sup> a crop eq | 8.7E+02  | 9.0E+02  | 0.0E+00  | -2.3E+01       |
| MRS             | kg Cu eq                 | 9.7E+00  | 3.4E-01  | 9.4E+00  | -7.1E-02       |
| FRS             | kg oil eq                | -9.0E+01 | 3.4E+02  | 0.0E+00  | -4.3E+02       |
| WC              | m <sup>3</sup>           | 1.1E+01  | 1.2E+01  | 0.0E+00  | -1.3E+00       |

187

188



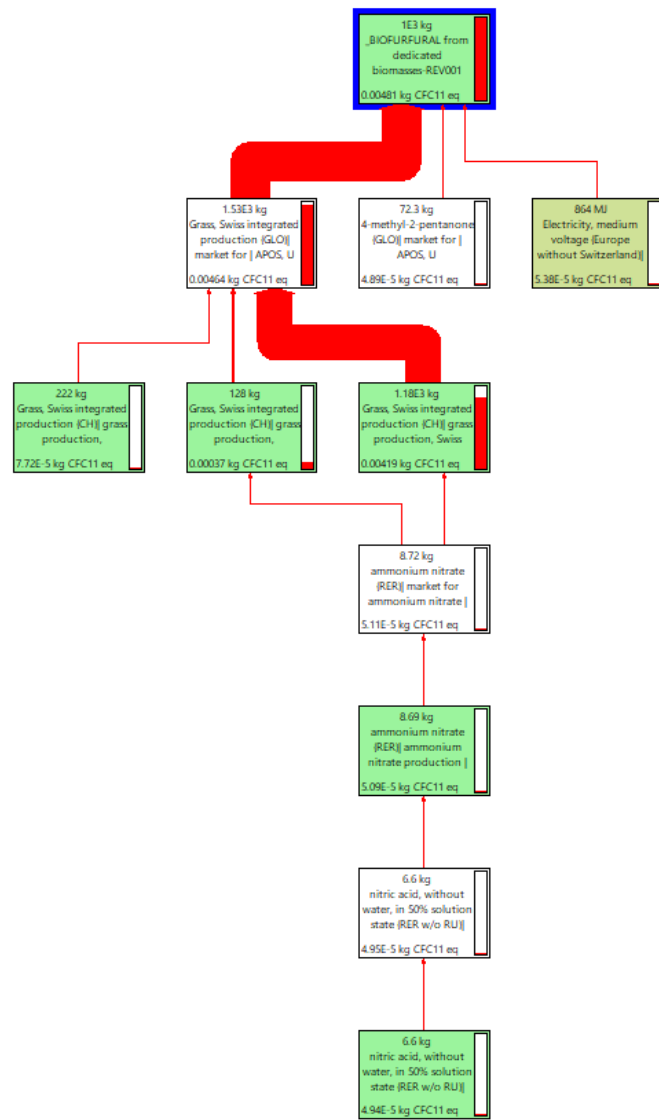

190

191 **Figure S 4** - Bio-Furf production (1 ton): Sankey-based diagram for the SOD category ReCiPe 2016 method (v.1.07).

192

193

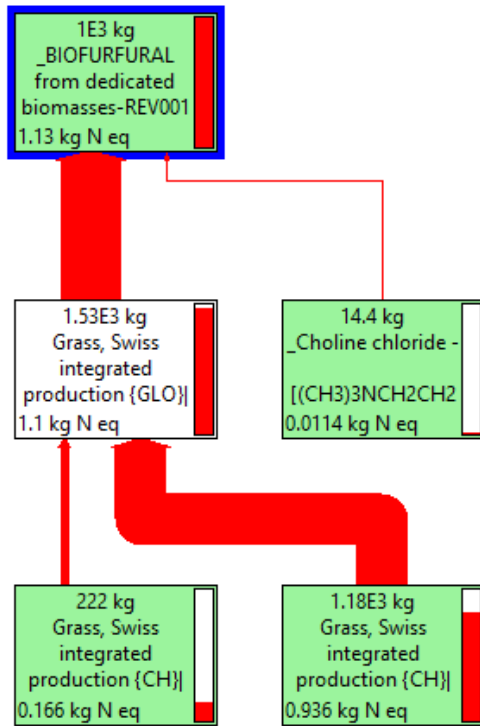

194

195

Figure S 5- Bio-Furf production (1 ton): Sankey-based diagram for the MEU category ReCiPe 2016 method (v.1.07).

196

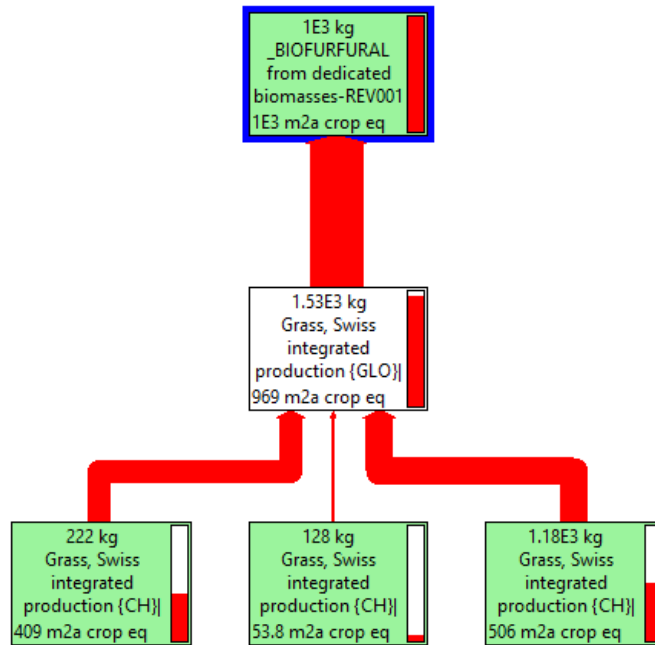

197

198

Figure S 6 - Bio-Furf production (1 ton): Sankey-based diagram for the LU category ReCiPe 2016 method (v.1.07).

199

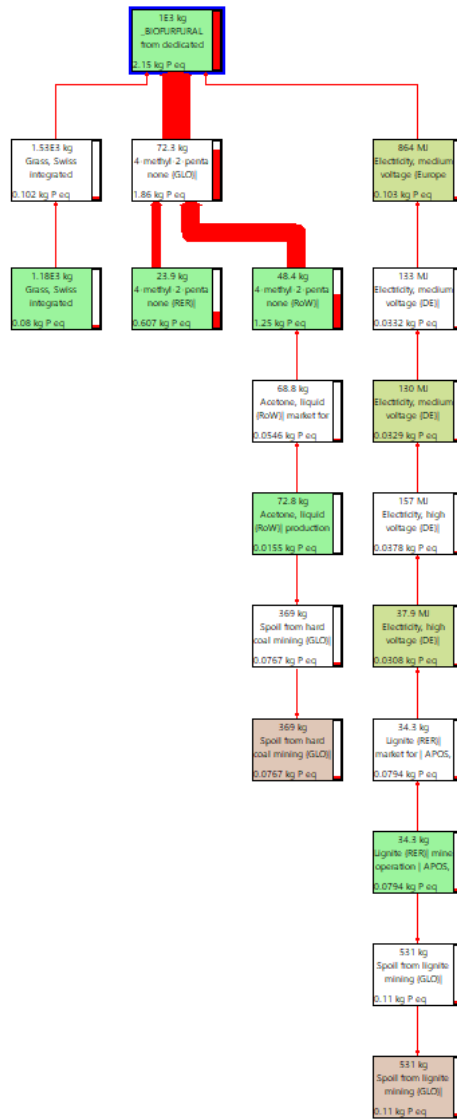

200

201

**Figure S 7** - Bio-Furf production (1 ton): Sankey-based diagram for the FWEu category ReCiPe 2016 method (v.1.07).

202

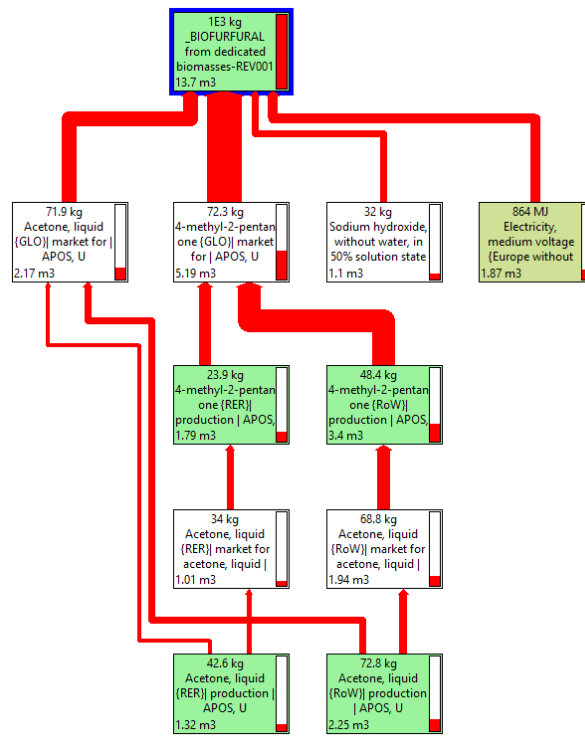

203

204

Figure S 8 - Bio-Furf production (1 ton): Sankey-based diagram for the WC category ReCiPe 2016 method (v.1.07).

205

| Impact category  | Unit                     | Cooling and process water | Maize    | Sugarcane | Swithgrass | Sulphuric acid (pretreatment and hydrolysis) | Resin (001) - styrene | Nutrient - ammonium sulphate | Nutrient - glucose | Sodium hydroxide (fermentation) | Resin (002) - amberlyte | Resin (003) - styrene | Sodium hydroxide (WWT) | Limestone for FGD | Sulphuric acid (pH adjuster) | Air emissions from wood boiler | Electricity recovered | Ash disposal |
|------------------|--------------------------|---------------------------|----------|-----------|------------|----------------------------------------------|-----------------------|------------------------------|--------------------|---------------------------------|-------------------------|-----------------------|------------------------|-------------------|------------------------------|--------------------------------|-----------------------|--------------|
| GW               | kg CO <sub>2</sub> eq    | 0.0E+00                   | 1.6E+03  | 9.6E+01   | 4.3E+02    | 4.6E+01                                      | 2.2E+01               | 9.0E+01                      | 1.2E+03            | 4.0E+01                         | 1.3E+01                 | 1.0E-01               | 2.2E+02                | 2.1E-01           | 2.2E-02                      | 2.7E-01                        | -1.8E+01              | 1.1E+01      |
| SOD              | kg CFC11 eq              | 0.0E+00                   | 1.8E-02  | 3.4E-03   | 1.0E-02    | 1.7E-05                                      | 3.4E-06               | 2.3E-05                      | 5.7E-03            | 4.5E-05                         | 1.4E-06                 | 1.6E-08               | 2.5E-04                | 4.6E-07           | 8.1E-09                      | 9.3E-06                        | -9.8E-06              | 1.6E-05      |
| IR               | kBq Co-60 eq             | 0.0E+00                   | 2.5E+01  | 1.3E+00   | 2.2E+00    | 5.2E+00                                      | 5.4E-01               | 5.9E+00                      | 6.5E+01            | 4.5E+00                         | 7.7E-01                 | 2.5E-03               | 2.4E+01                | 2.2E-03           | 2.4E-03                      | 0.0E+00                        | -9.5E+00              | 5.5E-01      |
| OF <sub>HH</sub> | kg NO <sub>x</sub> eq    | 0.0E+00                   | 4.6E+00  | 1.2E+00   | 1.7E+00    | 1.3E-01                                      | 7.7E-02               | 9.5E-02                      | 2.7E+00            | 1.0E-01                         | 1.9E-02                 | 3.6E-04               | 5.4E-01                | 4.9E-03           | 6.0E-05                      | 5.5E-02                        | -3.2E-02              | 6.0E-02      |
| FPMF             | kg PM <sub>2.5</sub> eq  | 0.0E+00                   | 3.5E+00  | 1.5E+00   | 3.4E+00    | 1.2E+00                                      | 3.4E-02               | 2.5E-01                      | 2.5E+00            | 8.6E-02                         | 1.5E-02                 | 1.6E-04               | 4.6E-01                | 1.9E-03           | 5.5E-04                      | 1.6E-02                        | -2.7E-02              | 2.5E-02      |
| OF <sub>TE</sub> | kg NO <sub>x</sub> eq    | 0.0E+00                   | 4.6E+00  | 1.2E+00   | 1.7E+00    | 1.3E-01                                      | 1.0E-01               | 9.6E-02                      | 2.7E+00            | 1.0E-01                         | 2.0E-02                 | 4.7E-04               | 5.4E-01                | 4.9E-03           | 6.0E-05                      | 5.5E-02                        | -3.2E-02              | 6.0E-02      |
| TA               | kg SO <sub>2</sub> eq    | 0.0E+00                   | 1.5E+01  | 5.5E+00   | 2.5E+01    | 4.0E+00                                      | 6.2E-02               | 9.9E-01                      | 1.0E+01            | 1.4E-01                         | 4.8E-02                 | 2.9E-04               | 7.7E-01                | 3.1E-03           | 1.9E-03                      | 2.2E-02                        | -6.8E-02              | 5.7E-02      |
| FWEu             | kg P eq                  | 0.0E+00                   | 6.9E-01  | 5.8E-02   | 1.7E-01    | 1.5E-02                                      | 7.9E-03               | 1.3E-02                      | 4.1E-01            | 2.0E-02                         | 1.3E-03                 | 3.7E-05               | 1.1E-01                | 3.2E-05           | 7.2E-06                      | 0.0E+00                        | -1.9E-02              | 4.0E-01      |
| MEu              | kg N eq                  | 0.0E+00                   | 2.8E+00  | 9.2E-01   | 2.5E+00    | 1.2E-03                                      | 4.1E-04               | 1.2E-01                      | 1.3E+00            | 2.1E-03                         | 1.2E-04                 | 1.9E-06               | 1.1E-02                | 1.7E-06           | 5.4E-07                      | 0.0E+00                        | -1.4E-03              | 2.3E-04      |
| TEu              | kg 1,4-DCB               | 0.0E+00                   | 2.6E+03  | 6.8E+02   | 1.7E+02    | 1.6E+03                                      | 2.0E+01               | 3.3E+02                      | 3.1E+03            | 5.5E+01                         | 1.8E+01                 | 9.2E-02               | 3.0E+02                | 2.2E-01           | 7.6E-01                      | 2.6E+01                        | -1.2E+01              | 1.0E+02      |
| FWEc             | kg 1,4-DCB               | 0.0E+00                   | 2.4E+01  | 5.6E+00   | 3.0E-01    | 1.5E+00                                      | 2.0E-01               | 2.8E+00                      | 1.6E+01            | 6.0E-01                         | 8.7E-02                 | 9.5E-04               | 3.2E+00                | 7.1E-04           | 6.9E-04                      | 7.1E-04                        | -5.2E-01              | 2.6E+02      |
| MEc              | kg 1,4-DCB               | 0.0E+00                   | 2.0E+01  | 3.5E+00   | 3.7E-01    | 3.3E+00                                      | 2.9E-01               | 1.1E+00                      | 1.6E+01            | 8.5E-01                         | 1.3E-01                 | 1.4E-03               | 4.6E+00                | 1.1E-03           | 1.5E-03                      | 1.7E-02                        | -7.2E-01              | 3.7E+02      |
| HCT              | kg 1,4-DCB               | 0.0E+00                   | 2.2E+01  | 2.6E+00   | 1.2E-01    | 8.1E-01                                      | 5.8E-01               | 7.2E-01                      | 2.1E+01            | 1.4E+00                         | 1.9E-01                 | 2.7E-03               | 7.5E+00                | 2.5E-03           | 3.8E-04                      | 6.1E-03                        | -1.0E+00              | 9.4E+00      |
| HNCT             | kg 1,4-DCB               | 0.0E+00                   | -3.0E+00 | 3.7E+02   | 3.8E+02    | 1.4E+02                                      | 8.7E+00               | 3.7E+01                      | -8.7E+02           | 2.9E+01                         | 3.0E+00                 | 4.1E-02               | 1.5E+02                | 2.9E-02           | 6.5E-02                      | 1.2E+00                        | -2.3E+01              | 9.9E+03      |
| LU               | m <sup>2</sup> a crop eq | 0.0E+00                   | 2.4E+03  | 6.2E+02   | 2.1E+03    | 1.7E+00                                      | 1.8E-01               | 1.9E+00                      | 7.2E+02            | 1.1E+00                         | 1.2E-01                 | 8.3E-04               | 6.2E+00                | 8.8E-03           | 7.7E-04                      | 0.0E+00                        | -3.1E+00              | 1.0E+01      |
| MRS              | kg Cu eq                 | 0.0E+00                   | 2.2E+00  | 4.9E-01   | 3.4E-02    | 2.3E-02                                      | 3.6E-03               | 6.3E-02                      | 1.2E+00            | 1.1E-02                         | 2.8E-03                 | 1.7E-05               | 6.1E-02                | 1.7E-04           | 1.1E-05                      | 0.0E+00                        | -1.5E-02              | 7.9E-02      |
| FRS              | kg oil eq                | 0.0E+00                   | 2.7E+02  | 2.7E+01   | 4.7E+01    | 5.6E+01                                      | 1.3E+01               | 3.8E+01                      | 3.1E+02            | 1.0E+01                         | 5.8E+00                 | 6.0E-02               | 5.4E+01                | 6.2E-02           | 2.6E-02                      | 0.0E+00                        | -5.0E+00              | 4.8E+00      |
| WC               | m <sup>3</sup>           | 7.7E+00                   | 5.8E+02  | 2.3E+01   | 8.9E-01    | 1.0E+01                                      | 2.3E-01               | 3.2E+00                      | 2.9E+01            | 1.1E+00                         | 2.3E-01                 | 1.1E-03               | 6.1E+00                | 2.8E-03           | 4.8E-03                      | 0.0E+00                        | -3.5E-01              | -1.5E-01     |

| Impact category  | Unit                     | Cooling and process water | Switchgrass | Sulphuric acid (DES pretreatment) | Choline chloride | Ethylene glycol | Acetone | Aluminium chloride | methyl isobutyl ketone (MIBK) | Sodium hydroxide | Limestone for FGD | Sulphuric acid (pH adjuster) | Air emissions from wood boiler | Electricity | Ash disposal |
|------------------|--------------------------|---------------------------|-------------|-----------------------------------|------------------|-----------------|---------|--------------------|-------------------------------|------------------|-------------------|------------------------------|--------------------------------|-------------|--------------|
| GW               | kg CO <sub>2</sub> eq    | 0.0E+00                   | 1.9E+02     | 3.1E+00                           | 2.6E+01          | 5.1E+01         | 1.7E+02 | 1.8E+01            | 3.3E+02                       | 3.7E+01          | 1.5E-02           | 4.7E-03                      | 1.0E-02                        | 7.3E+01     | 4.2E-01      |
| SOD              | kg CFC11 eq              | 0.0E+00                   | 4.7E-03     | 1.2E-06                           | 8.7E-06          | 9.3E-06         | 7.3E-06 | 6.5E-06            | 4.3E-05                       | 4.2E-05          | 3.3E-08           | 1.8E-09                      | 3.5E-07                        | 3.9E-05     | 6.1E-07      |
| IR               | kBq Co-60 eq             | 0.0E+00                   | 9.7E-01     | 3.4E-01                           | 1.9E+00          | 2.2E+00         | 1.6E+00 | 6.1E-01            | 9.2E+00                       | 4.1E+00          | 1.6E-04           | 5.3E-04                      | 0.0E+00                        | 3.8E+01     | 2.1E-02      |
| OF <sub>HH</sub> | kg NO <sub>x</sub> eq    | 0.0E+00                   | 7.4E-01     | 8.5E-03                           | 4.1E-02          | 9.7E-02         | 3.5E-01 | 4.4E-02            | 1.0E+00                       | 9.3E-02          | 3.5E-04           | 1.3E-05                      | 2.1E-03                        | 1.3E-01     | 2.3E-03      |
| FPMF             | kg PM <sub>2.5</sub> eq  | 0.0E+00                   | 1.5E+00     | 7.8E-02                           | 2.5E-02          | 6.6E-02         | 2.0E-01 | 3.6E-02            | 4.2E-01                       | 8.0E-02          | 1.3E-04           | 1.2E-04                      | 6.0E-04                        | 1.1E-01     | 9.7E-04      |
| OF <sub>TE</sub> | kg NO <sub>x</sub> eq    | 0.0E+00                   | 7.4E-01     | 8.5E-03                           | 4.2E-02          | 9.8E-02         | 3.7E-01 | 4.4E-02            | 1.2E+00                       | 9.3E-02          | 3.5E-04           | 1.3E-05                      | 2.1E-03                        | 1.3E-01     | 2.3E-03      |
| TA               | kg SO <sub>2</sub> eq    | 0.0E+00                   | 1.1E+01     | 2.7E-01                           | 7.1E-02          | 1.3E-01         | 5.8E-01 | 7.5E-02            | 1.1E+00                       | 1.3E-01          | 2.2E-04           | 4.1E-04                      | 8.4E-04                        | 2.7E-01     | 2.2E-03      |
| FWEu             | kg P eq                  | 0.0E+00                   | 7.8E-02     | 1.0E-03                           | 8.7E-03          | 1.4E-02         | 3.4E-02 | 7.2E-03            | 1.9E+00                       | 1.8E-02          | 2.3E-06           | 1.6E-06                      | 0.0E+00                        | 7.6E-02     | 1.5E-02      |
| MEu              | kg N eq                  | 0.0E+00                   | 1.1E+00     | 7.6E-05                           | 1.1E-02          | 8.7E-04         | 7.7E-04 | 4.7E-04            | 3.5E-03                       | 2.0E-03          | 1.3E-07           | 1.2E-07                      | 0.0E+00                        | 5.5E-03     | 8.9E-06      |
| TEu              | kg 1,4-DCB               | 0.0E+00                   | 7.8E+01     | 1.1E+02                           | 1.8E+01          | 2.7E+01         | 8.6E+01 | 1.3E+01            | 3.0E+02                       | 5.1E+01          | 1.6E-02           | 1.7E-01                      | 9.9E-01                        | 4.7E+01     | 3.9E+00      |
| FWEc             | kg 1,4-DCB               | 0.0E+00                   | 1.4E-01     | 9.8E-02                           | 2.3E-01          | 4.2E-01         | 6.0E-01 | 3.4E-01            | 3.1E+00                       | 5.5E-01          | 5.1E-05           | 1.5E-04                      | 2.7E-05                        | 2.1E+00     | 1.0E+01      |
| MEc              | kg 1,4-DCB               | 0.0E+00                   | 1.7E-01     | 2.2E-01                           | 3.2E-01          | 5.9E-01         | 8.3E-01 | 4.9E-01            | 3.3E+00                       | 7.9E-01          | 7.7E-05           | 3.3E-04                      | 6.6E-04                        | 2.9E+00     | 1.4E+01      |
| HCT              | kg 1,4-DCB               | 0.0E+00                   | 5.3E-02     | 5.4E-02                           | 4.0E-01          | 1.2E+00         | 2.8E+00 | 2.9E+00            | 6.2E+00                       | 1.3E+00          | 1.8E-04           | 8.3E-05                      | 2.3E-04                        | 4.2E+00     | 3.6E-01      |
| HNCT             | kg 1,4-DCB               | 0.0E+00                   | 1.7E+02     | 9.2E+00                           | 8.7E+00          | 1.9E+01         | 2.0E+01 | 1.4E+01            | 9.0E+01                       | 2.7E+01          | 2.1E-03           | 1.4E-02                      | 4.4E-02                        | 9.2E+01     | 3.8E+02      |
| LU               | m <sup>2</sup> a crop eq | 0.0E+00                   | 9.6E+02     | 1.1E-01                           | 6.8E-01          | 5.1E-01         | 5.2E-01 | 1.8E-01            | 3.8E+00                       | 1.1E+00          | 6.3E-04           | 1.7E-04                      | 0.0E+00                        | 1.2E+01     | 4.0E-01      |
| MRS              | kg Cu eq                 | 0.0E+00                   | 1.5E-02     | 1.5E-03                           | 1.2E-02          | 1.4E-02         | 1.6E-02 | 1.6E-01            | 7.9E-02                       | 1.0E-02          | 1.2E-05           | 2.4E-06                      | 0.0E+00                        | 5.9E-02     | 3.0E-03      |
| FRS              | kg oil eq                | 0.0E+00                   | 2.1E+01     | 3.7E+00                           | 1.7E+01          | 2.8E+01         | 1.0E+02 | 3.9E+00            | 1.7E+02                       | 9.3E+00          | 4.4E-03           | 5.7E-03                      | 0.0E+00                        | 2.0E+01     | 1.9E-01      |
| WC               | m <sup>3</sup>           | 1.1E+00                   | 4.0E-01     | 6.8E-01                           | 4.2E-01          | 6.6E-01         | 2.2E+00 | 1.6E-01            | 5.1E+00                       | 1.0E+00          | 2.0E-04           | 1.0E-03                      | 0.0E+00                        | 1.4E+00     | -5.9E-03     |

210

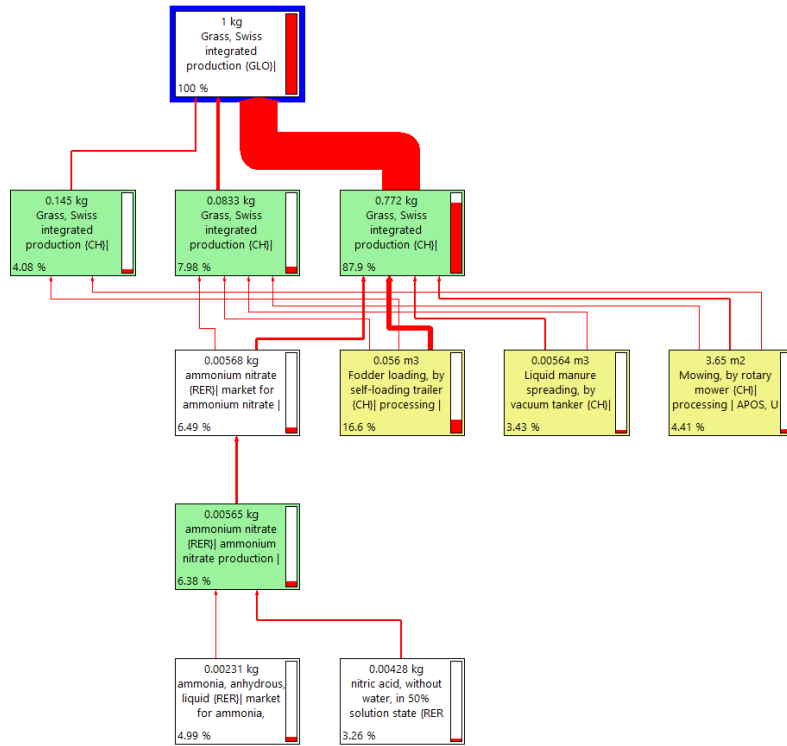

211

212 **Figure S 9** - Switchgrass production (1kg): Sankey-based diagram for the category climate change ReCiPe 2016 method (v.1.07).

213

214 **Table S 22** - Weidema's<sup>68</sup> quality pedigree matrix values adopted to estimate uncertainties, in Monte Carlo analysis.

| MA Bio-ButOH                      | Reliability | Completeness | Temporal correlation | Geographical correlation | Further technological correlation |
|-----------------------------------|-------------|--------------|----------------------|--------------------------|-----------------------------------|
| Bio-ButOH                         | 4           | 5            | 3                    | 3                        | 4                                 |
| Oxygen                            | 4           | 5            | 3                    | 3                        | 4                                 |
| Catalyst                          | 4           | 5            | 3                    | 3                        | 4                                 |
| Electricity                       | 4           | 5            | 1                    | 1                        | 4                                 |
| Emission CO <sub>2</sub>          | 4           | 5            | 3                    | 3                        | 4                                 |
| Emission CO                       | 4           | 5            | 3                    | 3                        | 4                                 |
| Emission Others (heavy compounds) | 4           | 5            | 3                    | 3                        | 4                                 |
| MA Bio-Furf                       | Reliability | Completeness | Temporal correlation | Geographical correlation | Further technological correlation |
| Bio-Furf                          | 4           | 5            | 2                    | 5                        | 4                                 |
| Oxygen                            | 4           | 5            | 2                    | 5                        | 4                                 |
| Catalyst                          | 4           | 5            | 2                    | 5                        | 4                                 |
| Electricity                       | 4           | 5            | 1                    | 1                        | 4                                 |
| Emission CO <sub>2</sub>          | 4           | 5            | 2                    | 5                        | 4                                 |
| Emission Others (heavy compounds) | 4           | 5            | 2                    | 5                        | 4                                 |

215

216

217  
218  
219  
220  
221  
222  
223  
224  
225  
226  
227  
228  
229  
230  
231  
232

## References

1. M. Aresta, A. Dibenedetto and F. Dumeignil, Biorefineries: An Introduction, Berlin, München, Boston: De Gruyter, 2015. <https://doi.org/10.1515/9783110331585>
2. E. Mahmoud, D. A. Watson and R. F. Lobo, Renewable production of phthalic anhydride from biomass-derived furan and maleic anhydride, *Green Chem.*, 2014, 16, 167-175.
3. Ludwig's Applied Process Design for Chemical and Petrochemical Plants, Volume 1, Fourth Edition, A. Kayode Coker Gulf Professional Publishing is an imprint of Elsevier 30 Corporate Drive, Suite 400, Burlington, MA 01803, USA Linacre House, Jordan Hill, Oxford OX2 8DP, UK 2007 Elsevier Inc.
4. National Institute of Standards and Technology (NIST). Available at: <https://webbook.nist.gov/cgi/cbook.cgi?ID=C71363&Mask=4> (accessed 22 June 2023).
5. TransFurans Chemicals bvba. Available at: <https://pdf4pro.com/amp/view/physical-properties-of-furfural-483595.html> (accessed 22 June 2023).
6. National Institute of Standards and Technology (NIST). Available at: <https://webbook.nist.gov/cgi/cbook.cgi?ID=C98011&Mask=4> (accessed 22 June 2023).
